# Supplementary material
Source: PubMed Central journal article supplement (PMC3346454)
Supplement: supp_78.9.3120_AEM-AEM07568-11-s01.pdf [file supp_78.9.3120_AEM-AEM07568-11-s01.pdf]

1 **Table S1. Naturally contaminated DNA samples studied by “GD1 C & D”, “GD2 C, D &**  
 2 **mosaic” arrays and LC-480 real-time PCR.**

3 <sup>a</sup>: Cts are calculated based on average Ct values of C-I and C-II for type C or D-I and D-II for  
 4 type D.

5 <sup>b</sup>: Cts are calculated based on average Ct values of C-II and D-III for type C-D or D-II, D-C and  
 6 C-III for type D-C.

7 <sup>c</sup>: Cts as calculated by the LC-480 software.

8 <sup>d</sup>: Types C and C-D are confirmed with oligos published in *Hill et al. (25)*.

9 <sup>e</sup>: Types D and D-C are confirmed with oligos published in *Kouguchi et al. (28)*.

10 (-) indicates a negative result.

11 SMB: Standard mouse bioassay.

12 NT: Not tested.

13 Discordant PCR results are bolded in grey.

14

| Origin | Sample | Country | SMB | GD1              |                 | GD2              |                 | Reference PCR (25, 28) |                 |
|--------|--------|---------|-----|------------------|-----------------|------------------|-----------------|------------------------|-----------------|
|        |        |         |     | <i>bont</i> type | Ct <sup>a</sup> | <i>bont</i> type | Ct <sup>b</sup> | <i>bont</i> type       | Ct <sup>c</sup> |
| Avian  | Feces  | France  | NT  | C                | 32.13           | C-D              | 33.30           | C <sup>d</sup>         | 34.69           |
|        |        |         |     | D                | 31.69           | D-C              | 33.71           | D <sup>e</sup>         | 33.61           |
| Bovine | Feces  | France  | NT  | C                | 35.99           | C-D              | 36.63           | C <sup>d</sup>         | 37.84           |
|        |        |         |     | D                | 37.64           | D-C              | 36.97           | D <sup>e</sup>         | 37.81           |
| Bovine | Feces  | France  | NT  | C                | 33.64           | C-D              | 32.96           | C <sup>d</sup>         | 33.36           |
| Bovine | Feces  | Italy   | -   | C                | 28.07           | C-D              | 26.94           | C <sup>d</sup>         | 28.84           |
| Bovine | Feces  | France  | NT  | D                | 21.04           | D-C              | 24.96           | D <sup>e</sup>         | 22.56           |
| Bovine | Feces  | France  | NT  | D                | 21.13           | D-C              | 21.83           | D <sup>e</sup>         | 20.77           |
| Bovine | Feces  | France  | NT  | D                | 25.61           | D-C              | 25.87           | D <sup>e</sup>         | 24.23           |
| Bovine | Feces  | France  | NT  | D                | 22.91           | D-C              | 24.08           | D <sup>e</sup>         | 22.97           |
| Bovine | Feces  | France  | NT  | D                | 21.31           | D-C              | 22.87           | D <sup>e</sup>         | 22.87           |
| Bovine | Feces  | France  | NT  | D                | 28.17           | D-C              | 28.86           | D <sup>e</sup>         | 25.93           |
| Bovine | Feces  | Italy   | D   | D                | 26.12           | D-C              | 25.91           | D <sup>e</sup>         | 25.04           |
| Bovine | Feces  | Italy   | D   | D                | 23.91           | D-C              | 23.06           | D <sup>e</sup>         | 24.5            |
| Bovine | Feces  | France  | NT  | D                | 27.72           | D-C              | 28.53           | D <sup>e</sup>         | 27.64           |
| Bovine | Feces  | France  | NT  | D                | 33.56           | D-C              | 34.78           | D <sup>e</sup>         | 37.85           |
| Bovine | Feces  | France  | NT  | -                | 0               | -                | 0               | -                      | 0               |
| Bovine | Feces  | France  | NT  | -                | 0               | -                | 0               | -                      | 0               |

|        |           |             |       |   |       |     |       |                |       |
|--------|-----------|-------------|-------|---|-------|-----|-------|----------------|-------|
| Bovine | Feces     | France      | NT    | - | 0     | -   | 0     | -              | 0     |
| Bovine | Feces     | France      | NT    | - | 0     | -   | 0     | -              | 0     |
| Bovine | Feces     | France      | NT    | - | 0     | -   | 0     | -              | 0     |
| Bovine | Feces     | France      | NT    | - | 0     | -   | 0     | -              | 0     |
| Bovine | Feces     | France      | NT    | - | 0     | -   | 0     | -              | 0     |
| Bovine | Feces     | Italy       | -     | - | 0     | -   | 0     | -              | 0     |
| Bovine | Feces     | Italy       | -     | - | 0     | -   | 0     | -              | 0     |
| Bovine | Feces     | Italy       | -     | - | 0     | -   | 0     | -              | 0     |
| Bovine | Feces     | Italy       | -     | - | 0     | -   | 0     | -              | 0     |
| Bovine | Feces     | Italy       | -     | - | 0     | -   | 0     | -              | 0     |
| Bovine | Feces     | Italy       | -     | - | 0     | -   | 0     | -              | 0     |
| Bovine | Feces     | Italy       | -     | - | 0     | -   | 0     | -              | 0     |
| Bovine | Feces     | France      | NT    | - | 0     | -   | 0     | -              | 0     |
| Bovine | Feces     | France      | NT    | - | 0     | -   | 0     | -              | 0     |
| Bovine | Feces     | France      | NT    | - | 0     | -   | 0     | -              | 0     |
| Bovine | Intestine | Netherlands | C & D | D | 22.94 | D-C | 23.98 | D <sup>e</sup> | 24.87 |
| Bovine | Intestine | Italy       | D     | D | 29.09 | D-C | 29.18 | D <sup>e</sup> | 28.75 |
| Bovine | Intestine | Italy       | -     | - | 0     | -   | 0     | -              | 0     |
| Bovine | Intestine | Italy       | -     | - | 0     | -   | 0     | -              | 0     |
| Bovine | Liver     | Italy       | D     | D | 25    | D-C | 24.02 | D <sup>e</sup> | 25.41 |
| Bovine | Liver     | Italy       | -     | - | 0     | -   | 0     | -              | 0     |
| Bovine | Liver     | Italy       | -     | - | 0     | -   | 0     | -              | 0     |
| Bovine | Rumen     | Italy       | D     | C | 33.5  | C-D | 31.71 | C <sup>d</sup> | 35.95 |
| Bovine | Rumen     | Italy       | D     | D | 24.71 | D-C | 23.68 | D <sup>e</sup> | 25.1  |
| Bovine | Rumen     | Italy       | D     | D | 32.02 | D-C | 32.42 | D <sup>e</sup> | 32.52 |
| Bovine | Rumen     | Italy       | -     | D | 32.7  | D-C | 33.17 | D <sup>e</sup> | 33.07 |
| Bovine | Rumen     | Italy       | -     | - | 0     | -   | 0     | -              | 0     |
| Bovine | Rumen     | Italy       | -     | - | 0     | -   | 0     | -              | 0     |
| Bovine | Rumen     | Netherlands | D     | - | 0     | -   | 0     | -              | 0     |
| Bovine | Spleen    | Italy       | -     | C | 31.08 | C-D | 30.72 | C <sup>d</sup> | 32.49 |
| Bovine | Spleen    | Italy       | D     | D | 28.77 | D-C | 27.71 | D <sup>e</sup> | 29.37 |
| Bovine | Udder     | Italy       | -     | - | 0     | -   | 0     | -              | 0     |
| Bovine | Udder     | Italy       | -     | - | 0     | -   | 0     | -              | 0     |
| Bovine | Udder     | Italy       | -     | - | 0     | -   | 0     | -              | 0     |
| Bovine | NA        | France      | NT    | - | 0     | -   | 0     | D <sup>e</sup> | 38.18 |
| Bovine | NA        | France      | NT    | - | 0     | -   | 0     | -              | 0     |
| Bovine | NA        | France      | NT    | - | 0     | -   | 0     | -              | 0     |
| Bovine | NA        | France      | NT    | - | 0     | -   | 0     | -              | 0     |
| Bovine | NA        | France      | NT    | - | 0     | -   | 0     | -              | 0     |
| Bovine | NA        | France      | NT    | - | 0     | -   | 0     | -              | 0     |

|             |           |             |    |   |       |     |       |                |       |
|-------------|-----------|-------------|----|---|-------|-----|-------|----------------|-------|
| Bovine      | NA        | France      | NT | - | 0     | -   | 0     | -              | 0     |
| Bovine      | NA        | France      | NA | - | 0     | -   | 0     | -              | 0     |
| Coot        | Intestine | Italy       | C  | C | 25.36 | C-D | 24.52 | C <sup>d</sup> | 26.41 |
| Coot        | Intestine | Italy       | -  | D | 26.95 | D-C | 25.8  | D <sup>e</sup> | 27.25 |
| Coot        | Intestine | Italy       | -  | - | 0     | -   | 0     | -              | 0     |
| Coot        | Intestine | Italy       | -  | - | 0     | -   | 0     | -              | 0     |
| Coot        | Intestine | Italy       | -  | - | 0     | -   | 0     | -              | 0     |
| Coot        | Liver     | Italy       | C  | C | 24.83 | C-D | 25.33 | C <sup>d</sup> | 26.43 |
| Coot        | Liver     | Italy       | -  | - | 0     | -   | 0     | -              | 0     |
| Coot        | Liver     | Italy       | -  | - | 0     | -   | 0     | -              | 0     |
| Coot        | Liver     | Italy       | -  | - | 0     | -   | 0     | -              | 0     |
| Coypus      | Intestine | Italy       | C  | C | 22.46 | C-D | 23.53 | C <sup>d</sup> | 23.17 |
| Coypus      | Intestine | Italy       | C  | C | 28.8  | C-D | 28.3  | C <sup>d</sup> | 28.77 |
| Coypus      | Liver     | Italy       | C  | C | 24.73 | C-D | 22.99 | C <sup>d</sup> | 24.93 |
| Dog         | Feces     | Italy       | C  | C | 26.3  | C-D | 25.55 | C <sup>d</sup> | 27.08 |
|             |           |             |    | D | 26.33 | D-C | 25.73 | D <sup>e</sup> | 27.12 |
| Dog         | Feces     | Italy       | C  | C | 25.5  | C-D | 24.63 | C <sup>d</sup> | 26.4  |
|             |           |             |    | D | 26.12 | D-C | 25.47 | D <sup>e</sup> | 27.01 |
| Egret       | Intestine | Italy       | C  | C | 24.36 | C-D | 24.04 | C <sup>d</sup> | 25.57 |
| Egret       | Liver     | Italy       | C  | C | 24.7  | C-D | 24.86 | C <sup>d</sup> | 26.28 |
| Egret       | Maggot    | Italy       | C  | C | 24.75 | C-D | 24.25 | C <sup>d</sup> | 25.59 |
| Environment | Forage    | Italy       | -  | - | 0     | -   | 0     | -              | 0     |
| Environment | Maggot    | Italy       | C  | C | 24.11 | C-D | 22.87 | C <sup>d</sup> | 24.62 |
| Environment | Mood      | Italy       | C  | C | 28.17 | C-D | 27.57 | C <sup>d</sup> | 29.66 |
| Environment | Mood      | Italy       | -  | - | 0     | -   | 0     | -              | 0     |
| Environment | Soil      | Italy       | C  | C | 25.82 | C-D | 25.22 | C <sup>d</sup> | 26.51 |
| Environment | Soil      | Italy       | -  | C | 31.46 | C-D | 30.42 | C <sup>d</sup> | 33.09 |
| Environment | Soil      | Italy       | -  | C | 29.08 | C-D | 32.12 | C <sup>d</sup> | 37.23 |
| Environment | Soil      | Italy       | -  | - | 0     | -   | 0     | -              | 0     |
| Environment | Soil      | Italy       | -  | - | 0     | -   | 0     | -              | 0     |
| Environment | Soil      | Netherlands | NT | - | 0     | -   | 0     | -              | 0     |
| Environment | Soil      | Netherlands | NT | - | 0     | -   | 0     | -              | 0     |
| Environment | Soil      | Netherlands | NT | - | 0     | -   | 0     | -              | 0     |
| Environment | Vegetable | Italy       | -  | C | 34.86 | C-D | 31.82 | C <sup>d</sup> | 36.11 |
| Environment | Vegetable | Italy       | -  | - | 0     | -   | 0     | -              | 0     |
| Environment | Vegetable | Italy       | -  | - | 0     | -   | 0     | -              | 0     |
| Environment | Vegetable | Italy       | -  | - | 0     | -   | 0     | -              | 0     |
| Feed        |           | France      | NT | - | 0     | -   | 0     | -              | 0     |
| Feed        |           | France      | NT | - | 0     | -   | 0     | -              | 0     |

|        |           |             |    |   |       |     |       |                |       |
|--------|-----------|-------------|----|---|-------|-----|-------|----------------|-------|
| Feed   |           | France      | NT | - | 0     | -   | 0     | -              | 0     |
| Feed   |           | Netherlands | C  | C | 26.76 | C-D | 26.5  | C <sup>d</sup> | 26.78 |
| Feed   |           | Netherlands | -  | - | 0     | -   | 0     | -              | 0     |
| Feed   |           | Netherlands | -  | - | 0     | -   | 0     | -              | 0     |
| Feed s |           | Netherlands | -  | - | 0     | -   | 0     | -              | 0     |
| Gallus | Droppings | France      | NT | - | 0     | -   | 0     | -              | 0     |
| Gallus | Droppings | France      | NT | - | 0     | -   | 0     | -              | 0     |
| Gallus | Feces     | France      | NT | C | 31.91 | C-D | 32.66 | C <sup>d</sup> | 37.34 |
| Gallus | Feces     | France      | NT | C | 33.48 | C-D | 32.87 | C <sup>d</sup> | 36.11 |
| Gallus | Feces     | France      | NT | C | 37.11 | C-D | 35.16 | C <sup>d</sup> | 35.85 |
| Gallus | Feces     | France      | NT | C | 32.81 | C-D | 34.14 | C <sup>d</sup> | 34.51 |
| Gallus | Feces     | France      | NT | C | 30.59 | C-D | 29.37 | C <sup>d</sup> | 33.82 |
| Gallus | Feces     | France      | NT | D | 33    | D-C | 34.42 | -              | 0     |
| Gallus | Feces     | France      | NT | - | 0     | -   | 0     | -              | 0     |
| Gallus | Feces     | France      | NT | - | 0     | -   | 0     | -              | 0     |
| Gallus | Intestine | Italy       | -  | - | 0     | -   | 0     | -              | 0     |
| Gallus | Serum     | France      | NT | C | 37.51 | C-D | 37.1  | C <sup>d</sup> | 36.44 |
| Gallus | Serum     | France      | NT | - | 0     | -   | 0     | -              | 0     |
| Gallus | NA        | France      | D  | C | 24.92 | C-D | 24.7  | C <sup>d</sup> | 24.89 |
| Gallus | NA        | France      | NT | C | 33.35 | C-D | 35.1  | C <sup>d</sup> | 34.39 |
| Gallus | NA        | France      | NT | C | 33.85 | C-D | 34.05 | C <sup>d</sup> | 36.1  |
| Gallus | NA        | France      | NT | C | 32.39 | C-D | 33.41 | C <sup>d</sup> | 35.28 |
| Gallus | NA        | France      | NT | C | 24.06 | C-D | 25.74 | C <sup>d</sup> | 30.05 |
| Gallus | NA        | France      | NT | C | 32.63 | C-D | 34.02 | C <sup>d</sup> | 36.04 |
| Gallus | NA        | France      | NT | C | 37.22 | C-D | 36.03 | C <sup>d</sup> | 37.88 |
| Gallus | NA        | France      | NT | C | 26.47 | C-D | 25.02 | C <sup>d</sup> | 26.12 |
| Gallus | NA        | France      | NT | C | 32.03 | C-D | 33.69 | C <sup>d</sup> | 34.25 |
| Gallus | NA        | France      | NT | C | 33.2  | C-D | 32.65 | C <sup>d</sup> | 33.63 |
| Gallus | NA        | France      | NT | C | 32.2  | C-D | 32.06 | C <sup>d</sup> | 36.03 |
| Gallus | NA        | France      | NT | C | 19.57 | C-D | 20.81 | C <sup>d</sup> | 21.54 |
| Gallus | NA        | France      | NT | C | 25.77 | C-D | 26.65 | C <sup>d</sup> | 27.08 |
| Gallus | NA        | France      | NT | C | 31.87 | C-D | 32.56 | C <sup>d</sup> | 32.01 |
| Gallus | NA        | France      | NT | C | 33.35 | C-D | 33.94 | C <sup>d</sup> | 38.21 |
| Gallus | NA        | France      | NT | C | 27.77 | C-D | 27.03 | C <sup>d</sup> | 29.95 |
| Gallus | NA        | France      | NT | D | 33.13 | D-C | 32.18 | D <sup>e</sup> | 34.25 |
| Gallus | NA        | France      | NT | D | 33.35 | D-C | 32.79 | D <sup>e</sup> | 33.58 |
| Gallus | NA        | France      | NT | - | 0     | -   | 0     | C <sup>d</sup> | 37.73 |
| Gallus | NA        | France      | D  | - | 0     | -   | 0     | -              | 0     |

|              |                  |             |       |   |       |     |       |                |       |
|--------------|------------------|-------------|-------|---|-------|-----|-------|----------------|-------|
| Gallus       | NA               | France      | NT    | - | 0     | -   | 0     | -              | 0     |
| Gallus       | NA               | France      | NT    | - | 0     | -   | 0     | -              | 0     |
| Gallus       | NA               | France      | NT    | - | 0     | -   | 0     | -              | 0     |
| Gallus       | NA               | France      | NT    | - | 0     | -   | 0     | -              | 0     |
| Gallus       | NA               | France      | NT    | - | 0     | -   | 0     | -              | 0     |
| Gallus       | NA               | France      | NT    | - | 0     | -   | 0     | -              | 0     |
| Goose        | Feces            | France      | NT    | - | 0     | -   | 0     | -              | 0     |
| Goose        | Intestine        | Italy       | -     | - | 0     | -   | 0     | -              | 0     |
| Goose        | Liver            | Italy       | -     | C | 28.18 | C-D | 26.92 | C <sup>d</sup> | 28.7  |
| Guinea fowl  | Feces            | France      | NT    | C | 33.25 | C-D | 34.25 | C <sup>d</sup> | 33.12 |
| Guinea fowl  | Feces            | France      | NT    | C | 29.08 | C-D | 30.45 | C <sup>d</sup> | 34.59 |
| Guinea fowl  | Feces            | France      | C & D | - | 0     | -   | 0     | -              | 0     |
| Guinea fowl  | NA               | France      | D     | - | 0     | -   | 0     | -              | 0     |
| Guinea fowl  | NA               | France      | NT    | - | 0     | -   | 0     | -              | 0     |
| Heron        | Intestine        | Italy       | C     | C | 27.8  | C-D | 26.15 | C <sup>d</sup> | 29.52 |
| Heron        | Intestine        | Italy       | -     | D | 27.03 | D-C | 25.62 | D <sup>e</sup> | 27.36 |
| Herring gull | Intestine        | Italy       | C     | C | 27.8  | C-D | 24.95 | C <sup>d</sup> | 31.45 |
| Herring gull | Intestine        | Italy       | C     | C | 27.01 | C-D | 25.72 | C <sup>d</sup> | 27.88 |
| Herring gull | Intestine        | Italy       | C     | C | 26.18 | C-D | 25.15 | C <sup>d</sup> | 27.16 |
| Herring gull | Liver            | Italy       | C     | C | 27.11 | C-D | 26.13 | C <sup>d</sup> | 37.76 |
| Herring gull | Liver            | Italy       | C     | C | 24.85 | C-D | 23.71 | C <sup>d</sup> | 25.33 |
| Herring gull | Liver            | Italy       | C     | C | 25.44 | C-D | 25.6  | C <sup>d</sup> | 27.22 |
| Horse        | Caecum           | Italy       | B     | - | 0     | -   | 0     | -              | 0     |
| Horse        | Caecum           | Italy       | B     | - | 0     | -   | 0     | -              | 0     |
| Horse        | Feces            | France      | NT    | - | 0     | -   | 0     | -              | 0     |
| Horse        | Intestine        | Netherlands | C     | - | 0     | -   | 0     | -              | 0     |
| Horse        | Intestine        | Italy       | B     | - | 0     | -   | 0     | -              | 0     |
| Kit buffer   | Negative control | Netherlands | -     | - | 0     | -   | 0     | -              | 0     |
| Maggot       | Maggot           | Italy       | C     | C | 27.44 | C-D | 25.92 | C <sup>d</sup> | 27.9  |
| Mallard      | Intestine        | Italy       | C     | C | 24.29 | C-D | 23.18 | C <sup>d</sup> | 24.75 |
| Mallard      | Intestine        | Italy       | C     | C | 28.83 | C-D | 25.61 | C <sup>d</sup> | 29.95 |
| Mallard      | Intestine        | Italy       | C     | C | 27.17 | C-D | 24.73 | C <sup>d</sup> | 28.6  |
| Mallard      | Intestine        | Italy       | C     | C | 27.99 | C-D | 27.66 | C <sup>d</sup> | 28.83 |
| Mallard      | Intestine        | Italy       | C     | C | 27.42 | C-D | 27.07 | C <sup>d</sup> | 29.1  |
| Mallard      | Intestine        | Italy       | C     | C | 23    | C-D | 22.64 | C <sup>d</sup> | 23.61 |
| Mallard      | Intestine        | Italy       | C     | C | 22.71 | C-D | 25.41 | C <sup>d</sup> | 23.8  |
| Mallard      | Liver            | Italy       | C     | C | 22.49 | C-D | 22.34 | C <sup>d</sup> | 24.77 |
| Mallard      | Liver            | Italy       | C     | C | 27.86 | C-D | 26.75 | C <sup>d</sup> | 28.99 |

|             |           |             |       |   |       |     |       |                |       |
|-------------|-----------|-------------|-------|---|-------|-----|-------|----------------|-------|
| Mink        | Feed      | Netherlands | C     | C | 34.52 | C-D | 33.55 | C <sup>d</sup> | 36.24 |
| Mink        | Feed      | Netherlands | D     | D | 23.48 | D-C | 23.82 | D <sup>e</sup> | 24.25 |
| Mink        | Feed      | Netherlands | D     | D | 34.45 | D-C | 34.84 | D <sup>e</sup> | 35.25 |
| Mink        | Feed      | Netherlands | C & D | - | 0     | -   | 0     | -              | 0     |
| Mink        | Feed      | Netherlands | C     | - | 0     | -   | 0     | -              | 0     |
| Mink        | Feed      | Netherlands | -     | - | 0     | -   | 0     | -              | 0     |
| Mink        | Feed      | Netherlands | D     | - | 0     | -   | 0     | -              | 0     |
| Mink        | Feed      | Netherlands | -     | - | 0     | -   | 0     | -              | 0     |
| Mink        | Feed      | Netherlands | -     | - | 0     | -   | 0     | -              | 0     |
| Mink        | Feed      | Netherlands | -     | - | 0     | -   | 0     | -              | 0     |
| Mink        | Feed      | Netherlands | -     | - | 0     | -   | 0     | -              | 0     |
| Mink        | Feed      | Netherlands | C     | - | 0     | -   | 0     | -              | 0     |
| Mink        | Feed      | Netherlands | -     | - | 0     | -   | 0     | -              | 0     |
| Moorhen     | Intestine | Italy       | -     | C | 23.58 | C-D | 24.06 | C <sup>d</sup> | 25.61 |
| Moorhen     | Intestine | Italy       | -     | - | 0     | -   | 0     | -              | 0     |
| Moorhen     | Liver     | Italy       | -     | - | 0     | -   | 0     | -              | 0     |
| Partridge   | NA        | France      | NT    | C | 33.01 | C-D | 29.97 | C <sup>d</sup> | 30.53 |
| Peewit gull | Intestine | Italy       | C     | C | 22.84 | C-D | 23.62 | C <sup>d</sup> | 23.6  |
| Peewit gull | Intestine | Italy       | -     | C | 31.51 | C-D | 30.3  | C <sup>d</sup> | 32.75 |
| Peewit gull | Intestine | Italy       | -     | C | 23.69 | C-D | 23.45 | C <sup>d</sup> | 25.44 |
| Peewit gull | Intestine | Italy       | -     | - | 0     | -   | 0     | -              | 0     |
| Peewit gull | Intestine | Italy       | -     | - | 0     | -   | 0     | -              | 0     |
| Peewit gull | Liver     | Italy       | C     | C | 25.93 | C-D | 24.6  | C <sup>d</sup> | 26.58 |
| Peewit gull | Liver     | Italy       | C     | C | 27.52 | C-D | 26.76 | C <sup>d</sup> | 28.75 |
| Peewit gull | Liver     | Italy       | -     | C | 33.18 | C-D | 31.38 | C <sup>d</sup> | 34.09 |
| Peewit gull | Liver     | Italy       | -     | - | 0     | -   | 0     | -              | 0     |
| Peewit gull | Liver     | Italy       | -     | - | 0     | -   | 0     | -              | 0     |
| Peewit gull | Liver     | Italy       | -     | - | 0     | -   | 0     | -              | 0     |
| Pheasant    | Liver     | Italy       | C     | C | 20.79 | C-D | 21.41 | C <sup>d</sup> | 22.49 |
| Pheasant    | Intestine | Italy       | C     | C | 21.7  | C-D | 21.92 | C <sup>d</sup> | 22.68 |
| Pheasant    | Spleen    | Italy       | C     | C | 22.97 | C-D | 22.87 | C <sup>d</sup> | 24.09 |
| Pheasant    | Spleen    | Italy       | C     | D | 31.04 | D-C | 30.99 | D <sup>e</sup> | 32.61 |
| Pheasant    | NA        | France      | NT    | C | 24.04 | C-D | 24.5  | C <sup>d</sup> | 25.42 |
| Pigeon      | Intestine | Italy       | -     | - | 0     | -   | 0     | -              | 0     |
| Pigeon      | Stomach   | Italy       | -     | - | 0     | -   | 0     | -              | 0     |
| Pochard     | Intestine | Italy       | C     | C | 27.46 | C-D | 26.39 | C <sup>d</sup> | 30.24 |
| Pochard     | Intestine | Italy       | -     | C | 29.6  | C-D | 28.75 | C <sup>d</sup> | 30.34 |
| Pochard     | Intestine | Italy       | -     | - | 0     | -   | 0     | -              | 0     |

|              |           |             |    |   |       |     |       |                |       |
|--------------|-----------|-------------|----|---|-------|-----|-------|----------------|-------|
| Pochard      | Liver     | Italy       | C  | C | 25.91 | C-D | 24.68 | C <sup>d</sup> | 26.34 |
| Pochard      | Liver     | Italy       | C  | C | 26.91 | C-D | 25.32 | C <sup>d</sup> | 28.11 |
| Pochard      | Liver     | Italy       | -  | C | 29.89 | C-D | 28.52 | C <sup>d</sup> | 30.74 |
| Poultry      | Feces     | France      | D  | - | 0     | -   | 0     | -              | 0     |
| Poultry      | Feces     | France      | NT | - | 0     | -   | 0     | -              | 0     |
| Poultry      | NA        | France      | NT | C | 32.49 | C-D | 33.9  | C <sup>d</sup> | 37.08 |
| Poultry      | NA        | France      | NT | - | 0     | -   | 0     | -              | 0     |
| Rabbit       | Intestine | Italy       | -  | C | 31.12 | C-D | 30.66 | C <sup>d</sup> | 32.25 |
| Rabbit       | Intestine | Italy       | -  | - | 0     | -   | 0     | -              | 0     |
| Rabbit       | Intestine | Italy       | -  | - | 0     | -   | 0     | -              | 0     |
| Rabbit       | Intestine | Italy       | -  | - | 0     | -   | 0     | -              | 0     |
| Rabbit       | Intestine | Italy       | -  | - | 0     | -   | 0     | -              | 0     |
| Rabbit       | Intestine | Italy       | -  | - | 0     | -   | 0     | -              | 0     |
| Rabbit       | Intestine | Italy       | -  | - | 0     | -   | 0     | -              | 0     |
| Rabbit       | Intestine | Italy       | -  | - | 0     | -   | 0     | -              | 0     |
| Rabbit       | Intestine | Italy       | -  | - | 0     | -   | 0     | -              | 0     |
| Rabbit       | Intestine | Italy       | -  | - | 0     | -   | 0     | -              | 0     |
| Rat          | Intestine | Italy       | C  | C | 29.9  | C-D | 29.44 | C <sup>d</sup> | 29.87 |
| Rat          | Intestine | Italy       | C  | C | 22.39 | C-D | 22.93 | C <sup>d</sup> | 23.78 |
| Rat          | Intestine | Italy       | -  | - | 0     | -   | 0     | -              | 0     |
| Rat          | Intestine | Italy       | -  | - | 0     | -   | 0     | -              | 0     |
| Rat          | Liver     | Italy       | C  | C | 23    | C-D | 24.24 | C <sup>d</sup> | 23.82 |
| Raw material | NA        | France      | NT | - | 0     | -   | 0     | -              | 0     |
| Swan         | Liver     | Netherlands | C  | C | 33.06 | C-D | 33.83 | C <sup>d</sup> | 36.32 |
| Turkey       | Feces     | France      | NT | C | 36.7  | C-D | 36.12 | C <sup>d</sup> | 36.25 |
| Turkey       | Feces     | France      | NT | - | 0     | -   | 0     | C <sup>d</sup> | 36.49 |
| Turkey       | Feces     | France      | NT | - | 0     | -   | 0     | C <sup>d</sup> | 36.71 |
| Turkey       | Feces     | France      | NT | - | 0     | -   | 0     | -              | 0     |
| Turkey       | Feces     | France      | NT | - | 0     | -   | 0     | -              | 0     |
| Turkey       | Feces     | France      | NT | - | 0     | -   | 0     | -              | 0     |
| Turkey       | Feces     | France      | D  | - | 0     | -   | 0     | -              | 0     |
| Turkey       | NA        | France      | NT | C | 35.82 | C-D | 33.97 | C <sup>d</sup> | 34.54 |
| Turkey       | NA        | France      | NT | D | 36.26 | D-C | 36.53 | D <sup>e</sup> | 36.93 |
| Turkey       | NA        | France      | NT | C | 34.52 | C-D | 35.99 | C <sup>d</sup> | 35.82 |
| Turkey       | NA        | France      | NT | C | 31.04 | C-D | 30.59 | C <sup>d</sup> | 31.2  |
| Turkey       | NA        | France      | NT | - | 0     | -   | 0     | C <sup>d</sup> | 38.03 |
| Turkey       | NA        | France      | NT | - | 0     | -   | 0     | -              | 0     |
| Turkey       | NA        | France      | NT | - | 0     | -   | 0     | -              | 0     |
| Turkey       | NA        | France      | NT | - | 0     | -   | 0     | -              | 0     |
| Turkey       | NA        | France      | NT | - | 0     | -   | 0     | -              | 0     |

|           |           |        |       |   |       |     |       |                |       |
|-----------|-----------|--------|-------|---|-------|-----|-------|----------------|-------|
| Turkey    | NA        | France | C & D | - | 0     | -   | 0     | -              | 0     |
| Turkey    | NA        | France | NT    | - | 0     | -   | 0     | -              | 0     |
| Turkey    | NA        | France | NT    | - | 0     | -   | 0     | -              | 0     |
| Turkey    | NA        | France | D     | - | 0     | -   | 0     | -              | 0     |
| Wild duck | Feces     | France | NT    | C | 23.97 | C-D | 25.36 | C <sup>d</sup> | 26.33 |
| Wild duck | Feces     | France | NT    | C | 29.73 | C-D | 31.52 | C <sup>d</sup> | 32.97 |
| Wild duck | Feces     | France | NT    | C | 27.34 | C-D | 28.35 | C <sup>d</sup> | 28.61 |
| Wild duck | Feces     | Italy  | C     | C | 28.39 | C-D | 27.76 | C <sup>d</sup> | 30.54 |
|           |           |        |       | D | 27.41 | D-C | 26.48 | D <sup>e</sup> | 28.88 |
| Wild duck | Feces     | France | NT    | - | 0     | -   | 0     | -              | 0     |
| Wild duck | Feces     | France | NT    | - | 0     | -   | 0     | -              | 0     |
| Wild duck | Feces     | France | NT    | - | 0     | -   | 0     | -              | 0     |
| Wild duck | Intestine | Italy  | C     | C | 28.43 | C-D | 26.95 | C <sup>d</sup> | 30.5  |
| Wild duck | Intestine | Italy  | C     | C | 24.77 | C-D | 25.11 | C <sup>d</sup> | 26.37 |
| Wild duck | Intestine | Italy  | C     | C | 25.88 | C-D | 25.39 | C <sup>d</sup> | 26.6  |
| Wild duck | Intestine | Italy  | C     | C | 26.69 | C-D | 25.56 | C <sup>d</sup> | 27.37 |
| Wild duck | Intestine | Italy  | C     | C | 23.92 | C-D | 23.07 | C <sup>d</sup> | 24.99 |
| Wild duck | Intestine | Italy  | C     | C | 24.11 | C-D | 23.81 | C <sup>d</sup> | 25.14 |
|           |           |        |       | D | 28.05 | D-C | 26.68 | D <sup>e</sup> | 28.7  |
| Wild duck | Intestine | Italy  | C     | C | 24.91 | C-D | 23.75 | C <sup>d</sup> | 25.3  |
| Wild duck | Intestine | Italy  | C     | C | 22.97 | C-D | 24.63 | C <sup>d</sup> | 23.84 |
| Wild duck | Intestine | Italy  | C     | C | 29.38 | C-D | 29.4  | C <sup>d</sup> | 30.74 |
| Wild duck | Intestine | Italy  | C     | C | 24.78 | C-D | 23.97 | C <sup>d</sup> | 26.47 |
| Wild duck | Intestine | Italy  | C     | C | 30.96 | C-D | 30.4  | C <sup>d</sup> | 30.78 |
| Wild duck | Intestine | Italy  | C     | C | 27.65 | C-D | 27.41 | C <sup>d</sup> | 27.92 |
| Wild duck | Intestine | Italy  | C     | C | 26.81 | C-D | 26.79 | C <sup>d</sup> | 27.68 |
| Wild duck | Intestine | Italy  | C     | C | 31.56 | C-D | 30.95 | C <sup>d</sup> | 32.45 |
| Wild duck | Intestine | Italy  | -     | - | 0     | -   | 0     | -              | 0     |
| Wild duck | Intestine | Italy  | -     | - | 0     | -   | 0     | -              | 0     |
| Wild duck | Intestine | Italy  | -     | - | 0     | -   | 0     | -              | 0     |
| Wild duck | Intestine | Italy  | -     | - | 0     | -   | 0     | -              | 0     |
| Wild duck | Intestine | Italy  | -     | - | 0     | -   | 0     | -              | 0     |
| Wild duck | Liver     | Italy  | C     | C | 27.43 | C-D | 26.61 | C <sup>d</sup> | 28.86 |
| Wild duck | Liver     | Italy  | C     | C | 22.54 | C-D | 23.12 | C <sup>d</sup> | 23.97 |
| Wild duck | Liver     | Italy  | C     | C | 29.99 | C-D | 28.8  | C <sup>d</sup> | 31.06 |
| Wild duck | Liver     | Italy  | C     | C | 25.77 | C-D | 24.77 | C <sup>d</sup> | 26.23 |
| Wild duck | Liver     | Italy  | C     | C | 27.12 | C-D | 25.5  | C <sup>d</sup> | 27.56 |
| Wild duck | Liver     | Italy  | C     | C | 26.81 | C-D | 26.27 | C <sup>d</sup> | 26.75 |



|           |       |             |    |   |       |     |       |                |       |
|-----------|-------|-------------|----|---|-------|-----|-------|----------------|-------|
| Wild duck | Liver | Italy       | C  | C | 26.75 | C-D | 25.83 | C <sup>d</sup> | 26.55 |
| Wild duck | Liver | Italy       | -  | C | 32.73 | C-D | 32.33 | C <sup>d</sup> | 35.27 |
| Wild duck | Liver | Italy       | -  | - | 0     | -   | 0     | -              | 0     |
| Wild duck | Liver | Netherlands | C  | - | 0     | -   | 0     | -              | 0     |
| Wild duck | NA    | France      | NT | C | 37.81 | C-D | 36.21 | C <sup>d</sup> | 37    |
| Wild duck | NA    | France      | NT | D | 33.17 | D-C | 33.46 | D <sup>e</sup> | 31.93 |
| Wild duck | NA    | France      | NT | - | 0     | -   | 0     | -              | 0     |
| Wild duck | NA    | France      | NT | - | 0     | -   | 0     | -              | 0     |
| Wild duck | NA    | France      | NT | - | 0     | -   | 0     | -              | 0     |
| Wild duck | NA    | France      | NT | - | 0     | -   | 0     | -              | 0     |
| Wild duck | NA    | France      | NT | - | 0     | -   | 0     | -              | 0     |

15

16

17
